# Supplementary material for: Adducin‐1 is essential for spindle pole integrity through its interaction with TPX2
Source: PubMed Central journal article supplement (PMC6073210; doi:10.15252/embr.201745607), 2018-06-19
Supplement: EMBR-19-e45607-s001.pdf [file EMBR-19-e45607-s001.pdf]

Appendix for  
**Adducin-1 is essential for spindle pole integrity through its interaction  
with TPX2**

Wen-Hsin Hsu, Won-Jing Wang, Wan-Yi Lin, Yu-Min Huang, Chien-Chen Lai, Jung-Chi  
Liao, and Hong-Chen Chen\*

\*Corresponding author. Email: hcchen1029@ym.edu.tw

**This PDF file includes:**

Appendix Figure S1

Appendix Figure S2

Appendix Figure S3

Appendix Figure S4

Appendix Figure S5

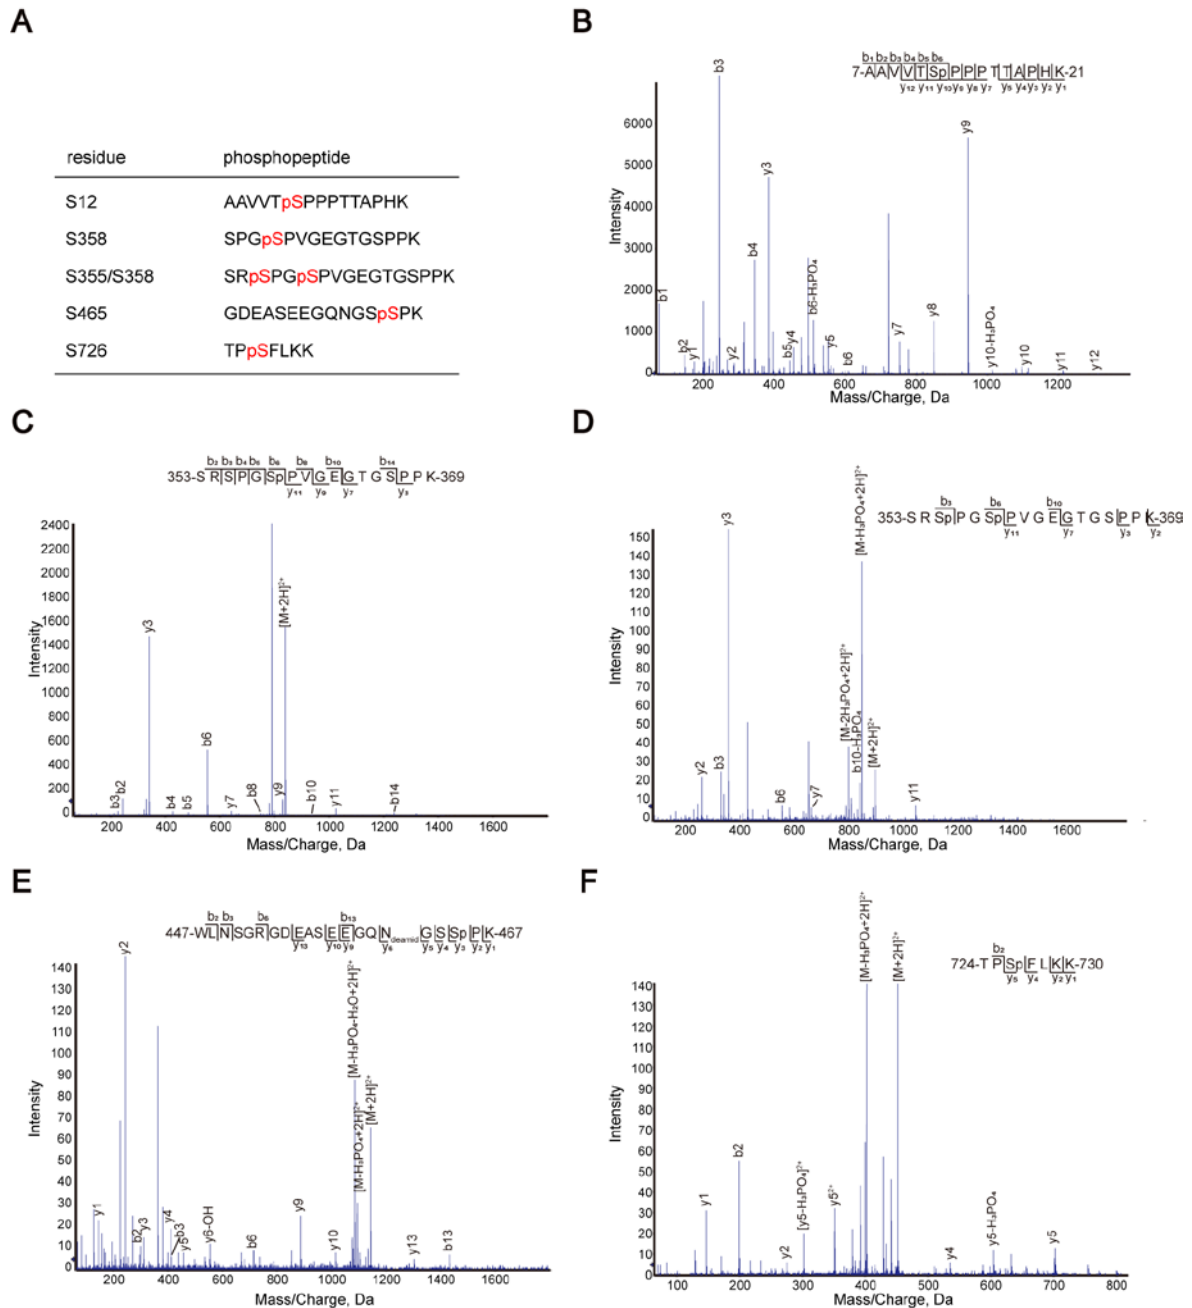

**Appendix Figure S1. Identification of ADD1 phosphorylation sites in mitotic HeLa cells by mass spectrometry. (A) Summary of the phosphorylation sites identified by mass spectrometry analysis. (B-F) The mass spectrum of the identified phospho-peptides derived from ADD1.**

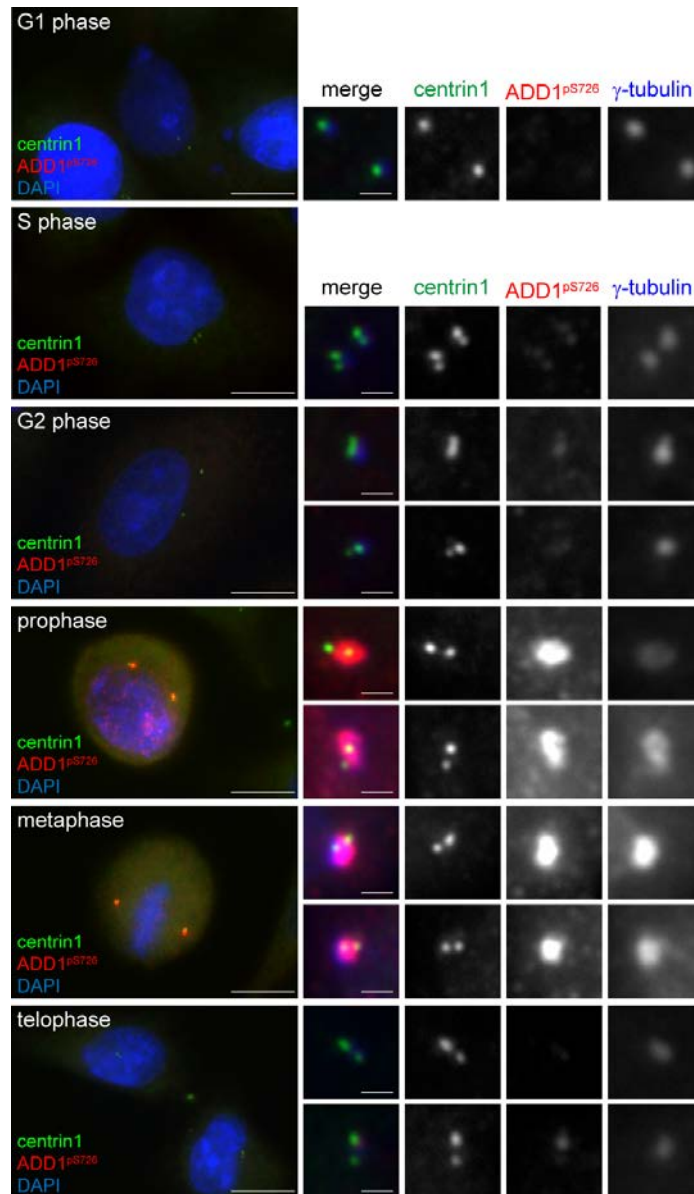

**Appendix Figure S2. ADD1 S726 phosphorylation is increased during mitosis in HeLa cells.** HeLa cells at the indicated cell-cycle phases were stained for ADD1 pS726, centrin1,  $\gamma$ -tubulin, and DNA. High magnification images of each centrosome are shown. Centrin1 is a marker for centrioles. Scale bars, 10  $\mu$ m (main image) and 1  $\mu$ m (zoomed images).

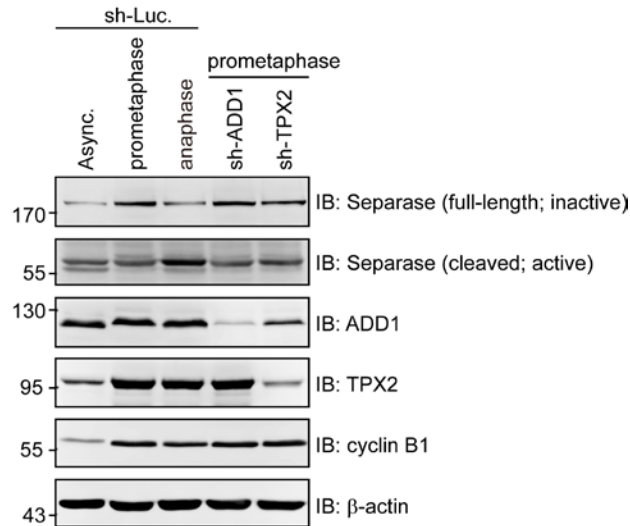

**Appendix Figure S3. ADD1 or TPX2 depletion does not induce premature separase activation.** HeLa cells were infected with lentiviruses expressing shRNAs to ADD1 (sh-ADD1), TPX2 (sh-TPX2), or luciferase (sh-Luc.). The cells remained asynchronous (Async.) or were synchronized at prometaphase by nocodazole. The prometaphase-arrested cells proceeded to the anaphase after nocodazole was removed for 2 h. Equal amounts of whole cell lysates were analyzed by immunoblotting with the indicated antibodies.

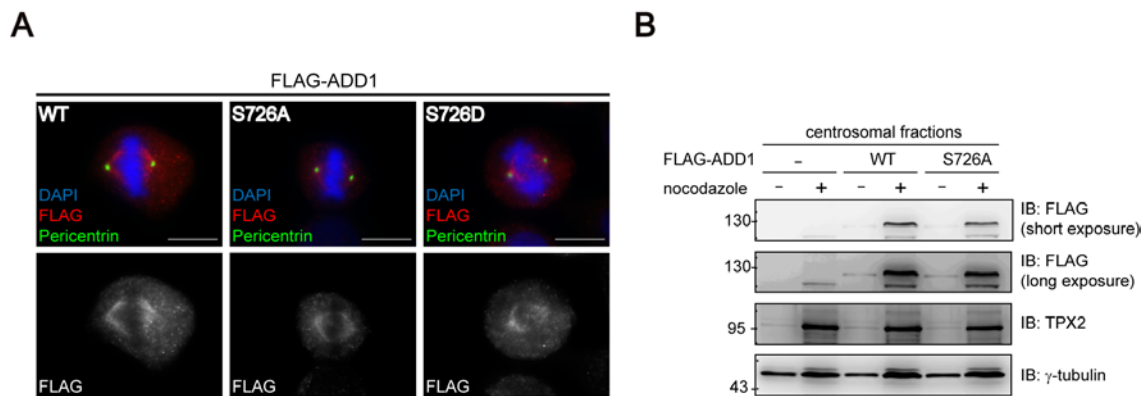

**Appendix Figure S4. ADD1 S726 phosphorylation is not required for its centrosomal localization.** (A) HeLa cells stably expressing FLAG-ADD1 WT, S726A, or S726D were stained for FLAG-ADD1, pericentrin, and DNA. Scale bars, 10  $\mu$ m. (B) HeLa cells stably expressing FLAG-ADD1 WT or S726A remained asynchronous (-) or were synchronized at the M phase by nocodazole (+). The centrosomes were isolated from equal amounts of cells and analyzed by immunoblotting with the indicated antibodies.

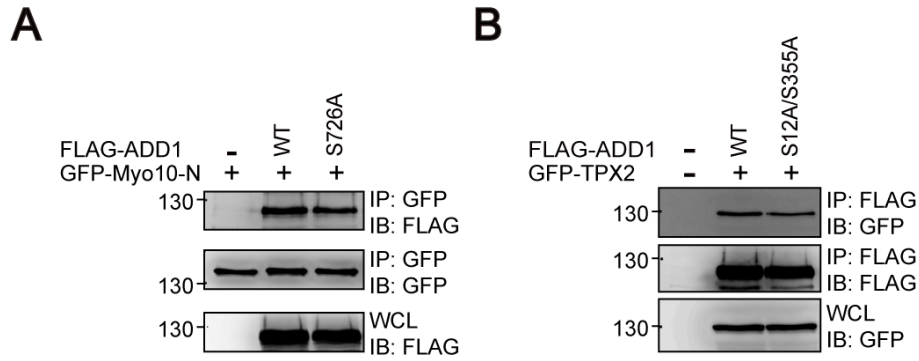

**Appendix Figure S5. The interaction of ADD1 with Myo10 and TPX2 relies on serine phosphorylation at different sites.** (A) GFP-fused N-terminus of Myo10 (GFP-Myo10-N) was transiently co-expressed with FLAG-ADD1 WT or S726A mutant in HEK293 cells. GFP-Myo10-N was immunoprecipitated (IP) by anti-GFP, and the immunocomplexes were analyzed by immunoblotting with anti-FLAG or anti-GFP. (B) GFP-TPX2 was co-expressed with FLAG-ADD1 WT or S12A/S355A mutant in HEK293 cells. Cell lysates were incubated with anti-FLAG (M2) affinity resins. The bound proteins were eluted from the resins with FLAG peptides and analyzed by immunoblotting (IB) with anti-FLAG or anti-GFP.
