# Supplementary material for: Adducin‐1 is essential for spindle pole integrity through its interaction with TPX2
Source: PubMed Central journal article supplement (PMC6073210; doi:10.15252/embr.201745607), 2018-06-19

Source data for Figure 1

A

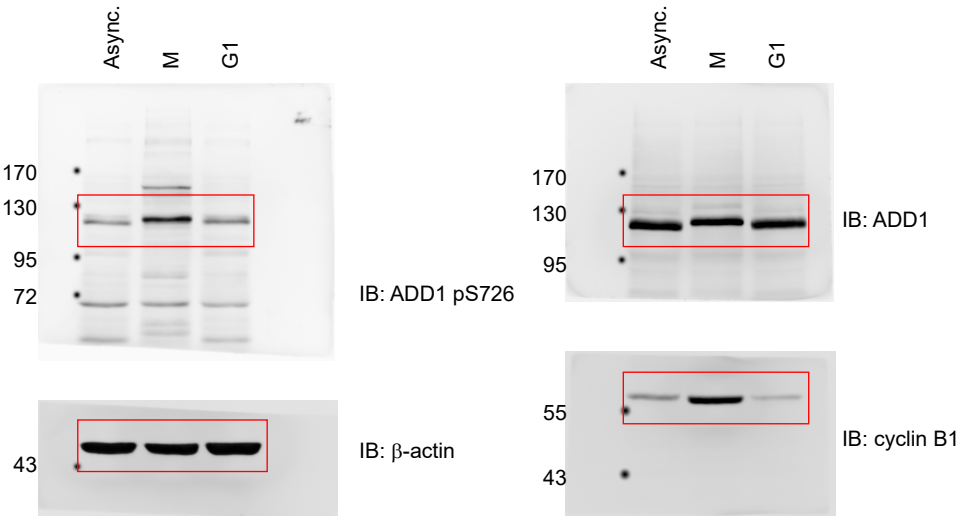

Supplement: EMBR-19-e45607-s003.pdf [file EMBR-19-e45607-s003.pdf]
