# Supplementary material for: Adducin‐1 is essential for spindle pole integrity through its interaction with TPX2
Source: PubMed Central journal article supplement (PMC6073210; doi:10.15252/embr.201745607), 2018-06-19
Supplement: EMBR-19-e45607-s005.pdf [file EMBR-19-e45607-s005.pdf]

Source data for Figure 4

A

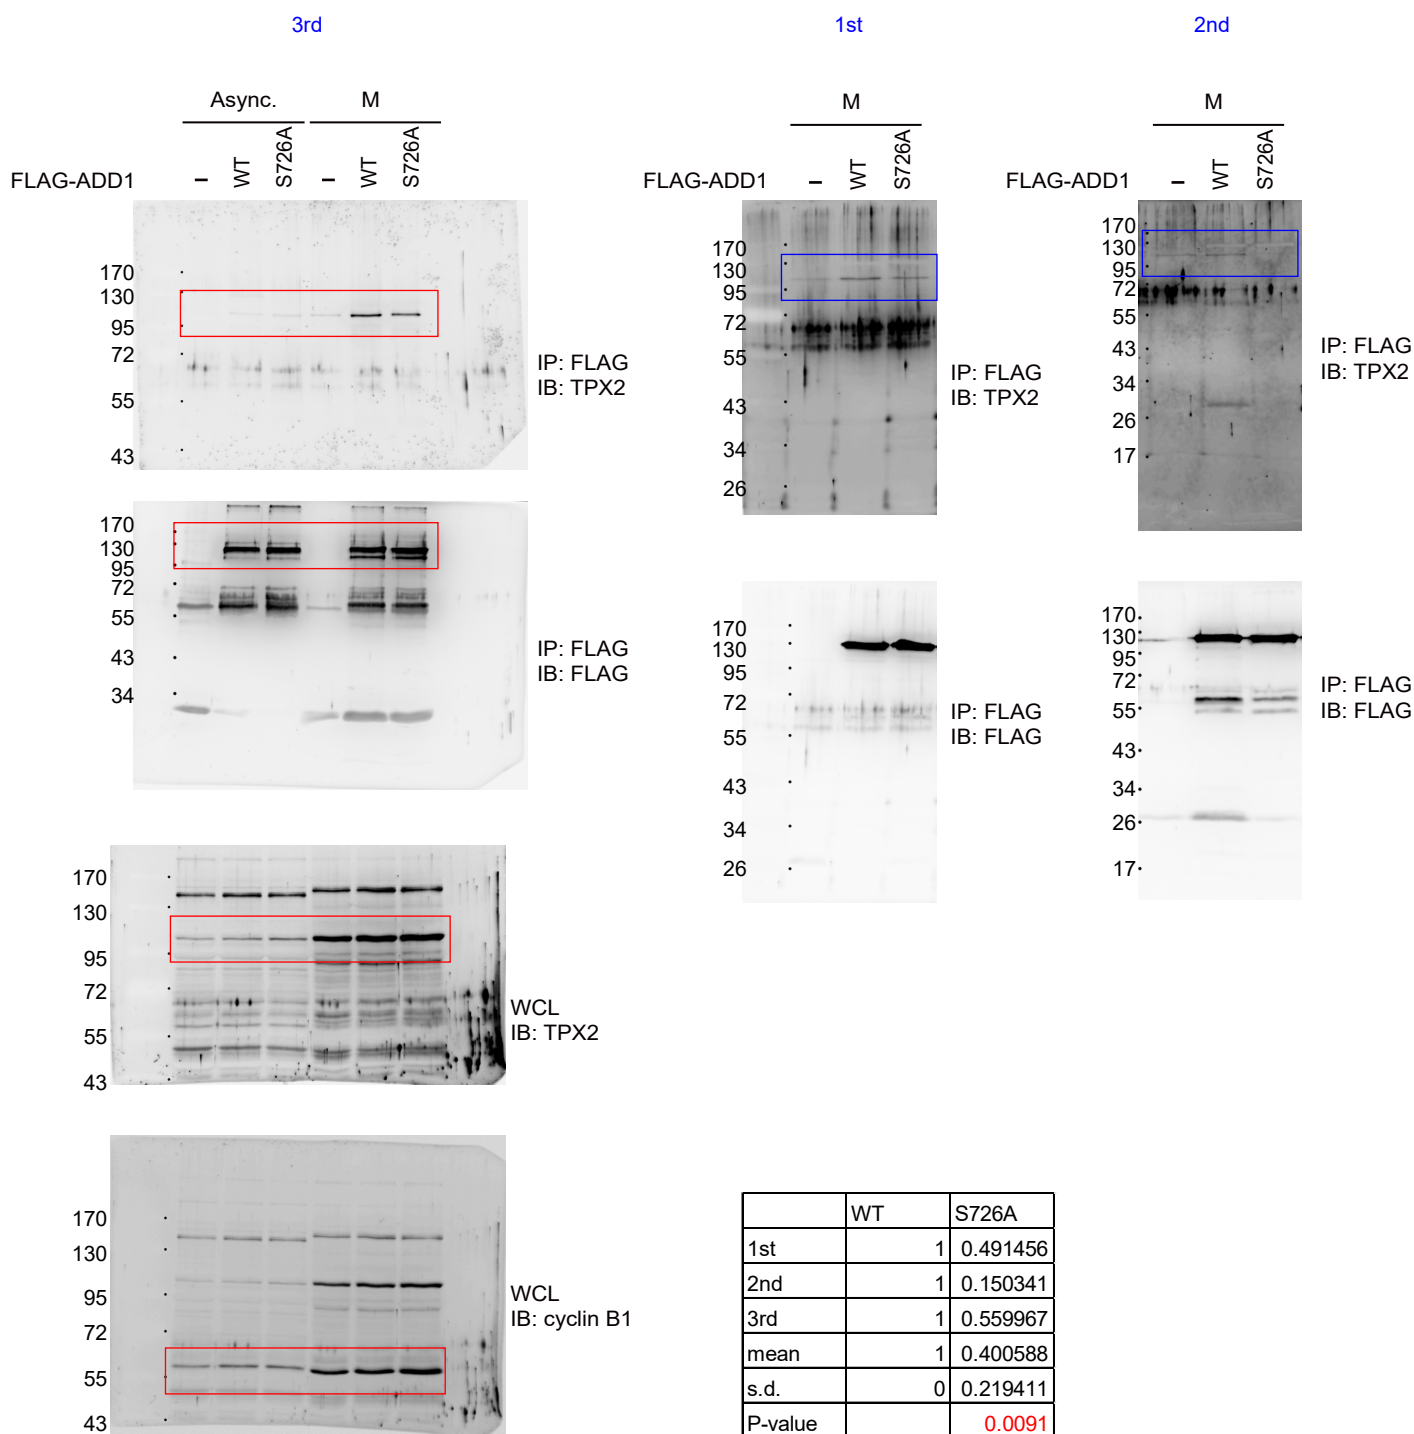

Source data for Figure 4

**B**

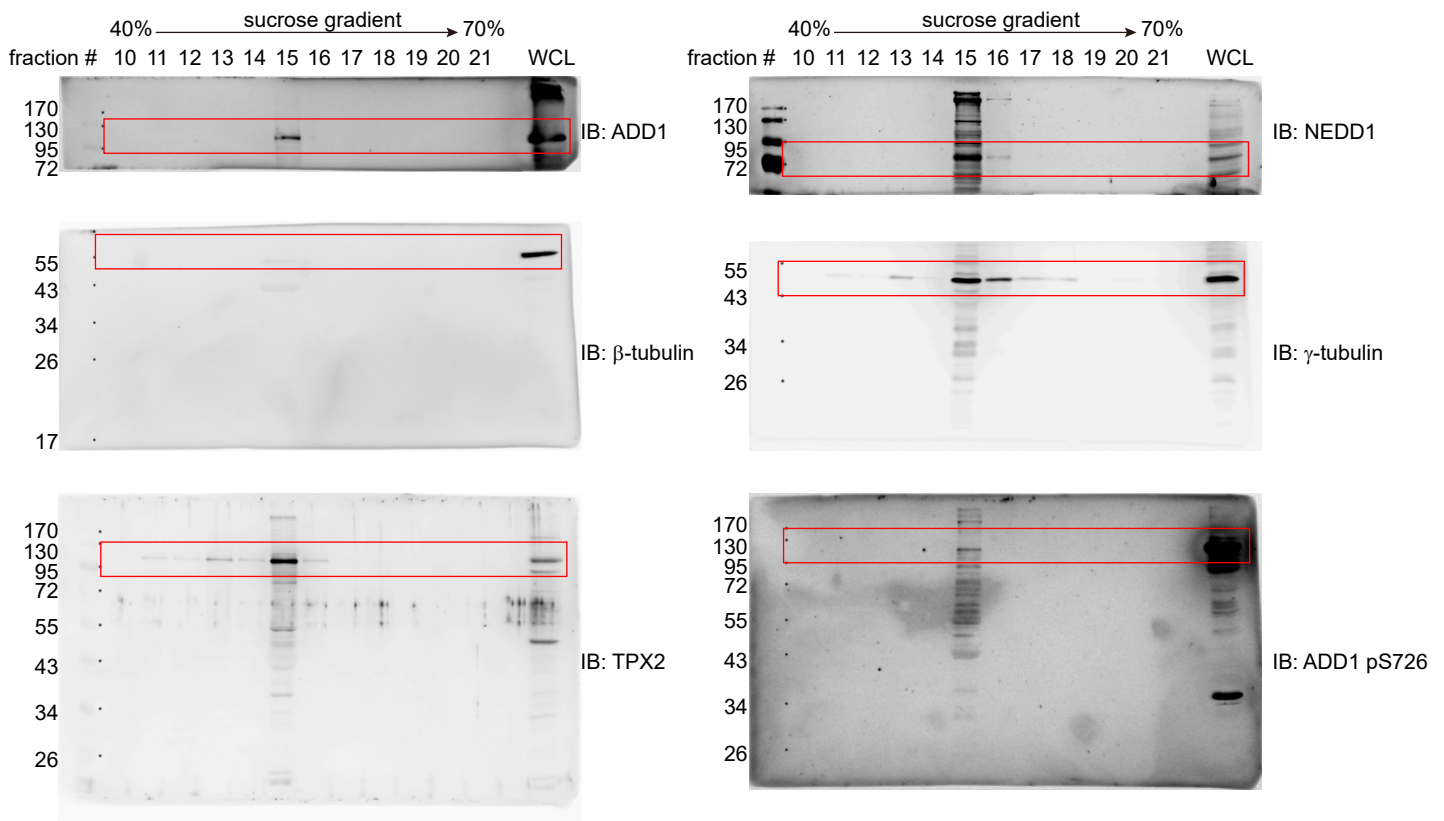

Source data for Figure 4

**E**

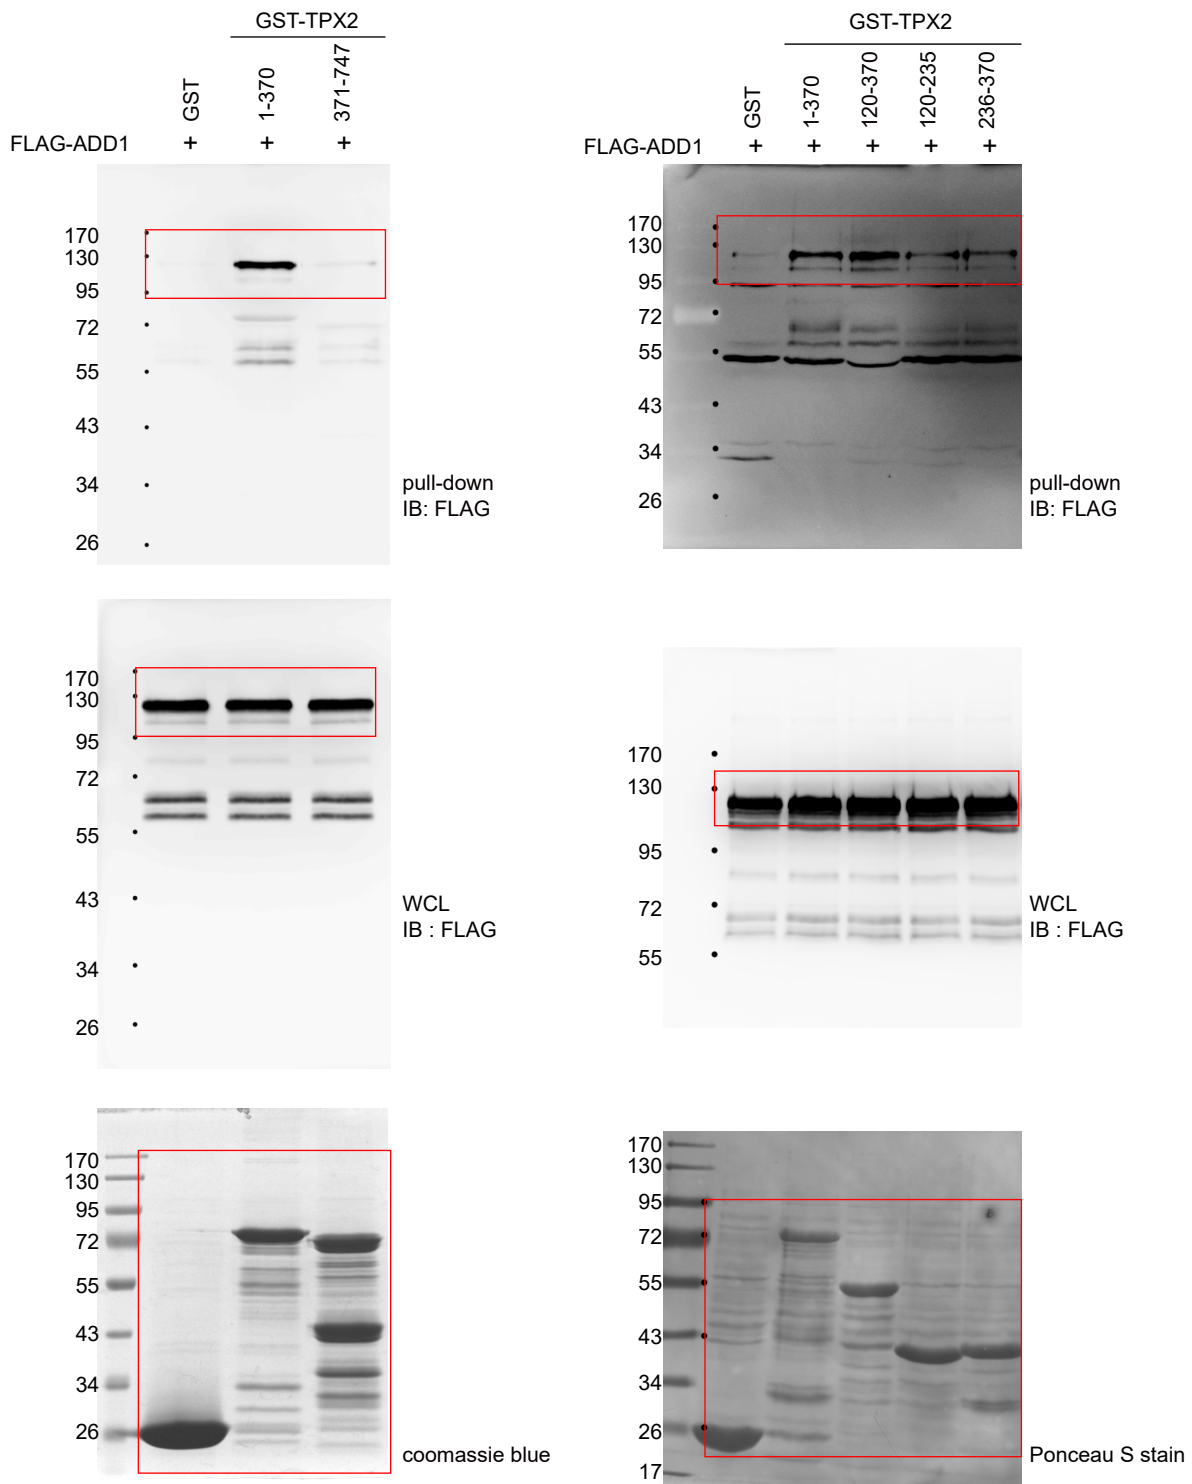

Source data for Figure 4

F

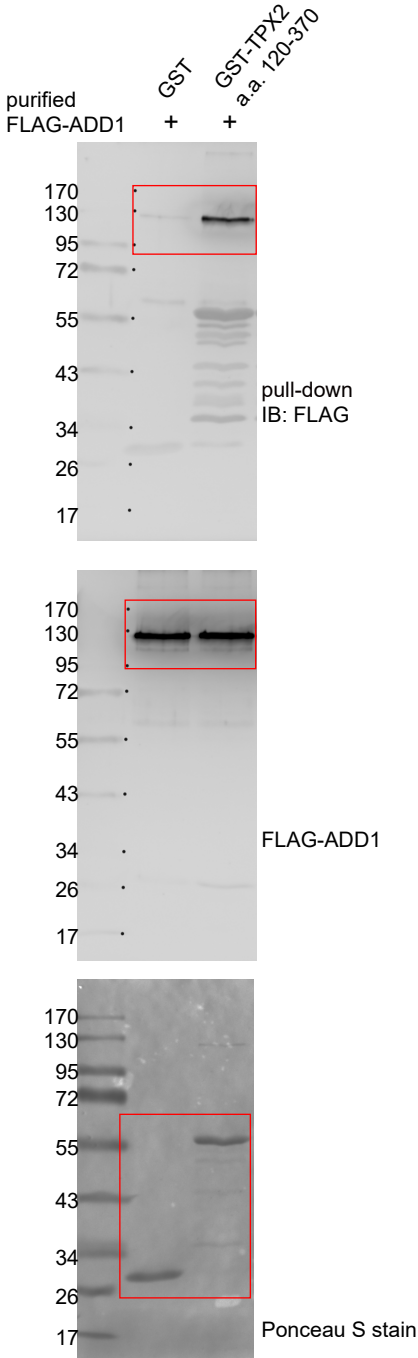

G

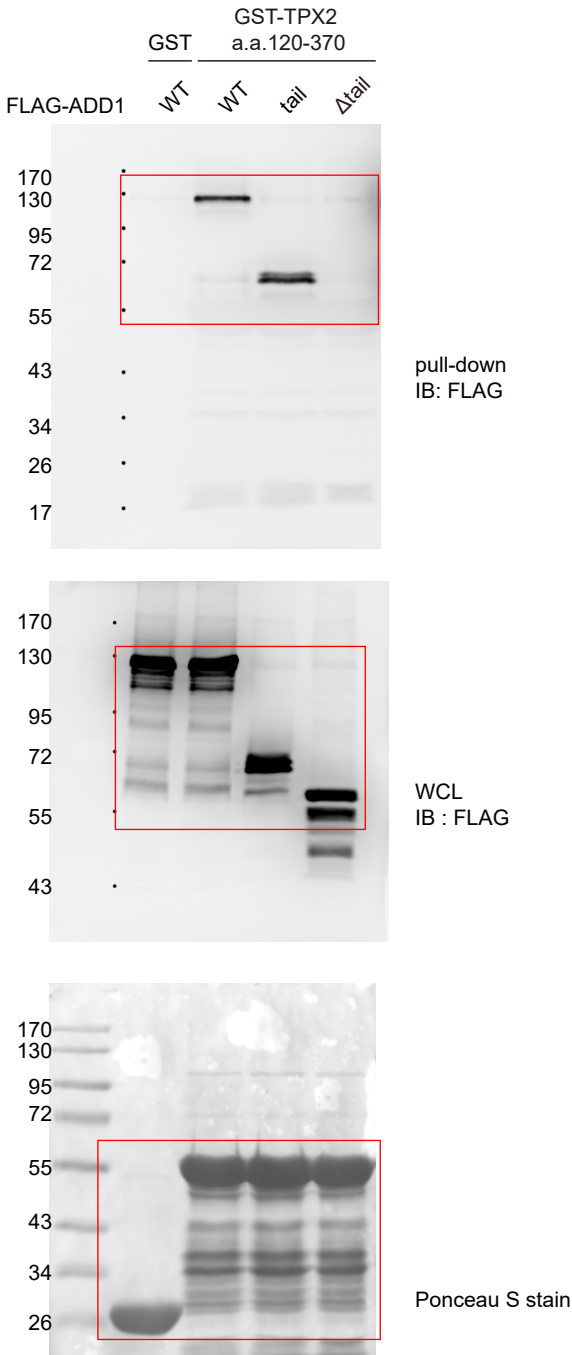

Source data for Figure 4

H

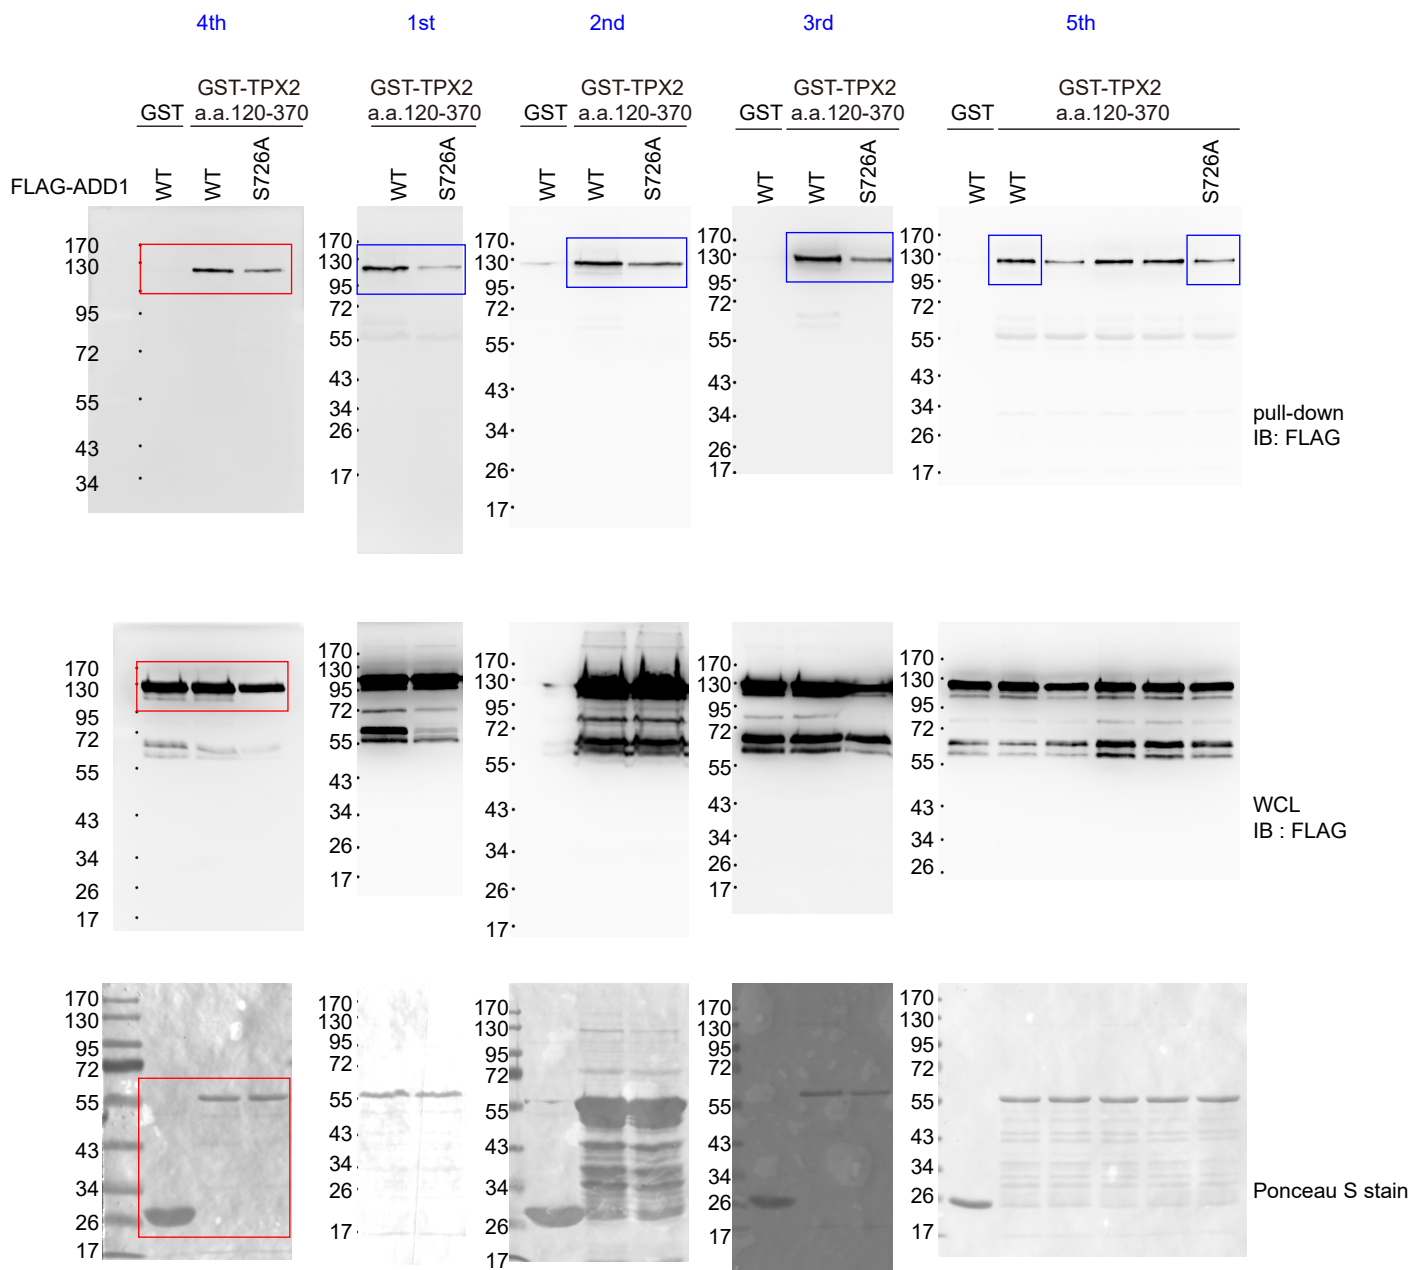

|         | WT | S726A           |
|---------|----|-----------------|
| 1st     | 1  | 0.155227        |
| 2nd     | 1  | 0.600589        |
| 3rd     | 1  | 0.304897        |
| 4th     | 1  | 0.431667        |
| 5th     | 1  | 0.517144        |
| mean    | 1  | 0.401905        |
| s.d.    | 0  | 0.175998        |
| P-value |    | <b>6.00E-05</b> |
